# Supplementary material for: Application of DSM-5 Criteria for Autism Spectrum Disorder to Three Samples of Children With DSM-IV Diagnoses of Pervasive Developmental Disorders
Source: Atypon-hosted journal article supplement (doi:10.1176/appi.ajp.2012.12020276), 2012-10-01
Supplement: 1056_ds001.pdf [file 1056_ds001.pdf]

Supplementary Table S1. ADI-R and ADOS Items Applied to Proposed DSM-V Criteria

|                                                                                                                                                                                                                                                                 |                    | Under 4,<br>Mod 1                                                                        | Under 4,<br>Mod 2                                                                                         | Under 4,<br>Mod 3                                                                                         | 4 to 10,<br>Mod 1                                                                        | 4 to 10,<br>Mod 2                                                                                | 4 to 10,<br>Mod 3                                                                                | Over 10,<br>Mod 1                                                                        | Over 10,<br>Mod 2                                                                     | Over 10,<br>Mod 3-4                                                                             |
|-----------------------------------------------------------------------------------------------------------------------------------------------------------------------------------------------------------------------------------------------------------------|--------------------|------------------------------------------------------------------------------------------|-----------------------------------------------------------------------------------------------------------|-----------------------------------------------------------------------------------------------------------|------------------------------------------------------------------------------------------|--------------------------------------------------------------------------------------------------|--------------------------------------------------------------------------------------------------|------------------------------------------------------------------------------------------|---------------------------------------------------------------------------------------|-------------------------------------------------------------------------------------------------|
| A1. Deficits in social-emotional reciprocity; ranging from abnormal social approach and failure of normal back and forth conversation through reduced sharing of interests, emotions, and affect and response to total lack of initiation of social interaction | ADI-R ITEMS (CUR.) | COM31<br>SOCIAL61<br>SOCIAL52<br>SOCIAL54<br>SOCIAL55<br>COM46<br>SOCIAL51 <sup>a</sup>  | COM34<br>COM35<br>COM31<br>SOCIAL61<br>SOCIAL52<br>SOCIAL54<br>SOCIAL55<br>COM46<br>SOCIAL51 <sup>a</sup> | COM34<br>COM35<br>COM31<br>SOCIAL61<br>SOCIAL52<br>SOCIAL54<br>SOCIAL55<br>COM46<br>SOCIAL51 <sup>a</sup> | COM31<br>SOCIAL61<br>SOCIAL52<br>SOCIAL54<br>SOCIAL55<br>SOCIAL51 <sup>a</sup>           | COM34<br>COM35<br>COM31<br>SOCIAL61<br>SOCIAL52<br>SOCIAL54<br>SOCIAL55<br>SOCIAL51 <sup>a</sup> | COM34<br>COM35<br>COM31<br>SOCIAL61<br>SOCIAL52<br>SOCIAL54<br>SOCIAL55<br>SOCIAL51 <sup>a</sup> | COM31<br>SOCIAL52<br>SOCIAL54<br>SOCIAL55<br>SOCIAL51 <sup>a</sup>                       | COM34<br>COM35<br>COM31<br>SOCIAL52<br>SOCIAL54<br>SOCIAL55<br>SOCIAL51 <sup>a</sup>  | COM34<br>COM35<br>COM31<br>SOCIAL52<br>SOCIAL54<br>SOCIAL55<br>SOCIAL51 <sup>a</sup>            |
|                                                                                                                                                                                                                                                                 | ADOS ITEMS         | MOD1B12<br>MOD1B5<br>MOD1A6<br>MOD1A2<br>MOD1B8<br>MOD1B9<br>MOD1B10<br>MOD1B6<br>MOD1B2 | MOD2B8<br>MOD2B3<br><br>MOD2B5<br>MOD2B6<br>MOD2B4<br><br>MOD2A2<br>MOD2B10<br>MOD2A6                     | MOD3B7<br>MOD3B4<br><br><br>MOD3B9<br>MOD3A8<br>MOD3A5<br>MOD3A6                                          | MOD1B12<br>MOD1B5<br>MOD1A6<br>MOD1A2<br>MOD1B8<br>MOD1B9<br>MOD1B10<br>MOD1B6<br>MOD1B2 | MOD2B8<br>MOD2B3<br><br>MOD2B5<br>MOD2B6<br>MOD2B4<br><br>MOD2A2<br>MOD2B10<br>MOD2A6            | MOD3B7MO<br>D3B4<br><br><br>MOD3B9<br>MOD3A8<br>MOD3A5<br>MOD3A6                                 | MOD1B12<br>MOD1B5<br>MOD1A6<br>MOD1A2<br>MOD1B8<br>MOD1B9<br>MOD1B10<br>MOD1B6<br>MOD1B2 | MOD2B8<br>MOD2B3<br><br>MOD2B5<br>MOD2B6<br>MOD2B4<br><br>MOD2A2<br>MOD2B10<br>MOD2A6 | MOD3B7/M<br>OD4B9<br>MOD3&4B4<br><br><br>MOD3B9/M<br>OD4B11<br>MOD3&4A8<br>MOD3&4A5<br>MOD3&4A6 |

|                                                                                                                                                                                                                                                                                                                                 |                    |                                                                                  |                                                                      |                                                                      |                                                                                                       |                                                                                                                |                                                                                                                |                                                                                  |                                                                   |                                                                                |
|---------------------------------------------------------------------------------------------------------------------------------------------------------------------------------------------------------------------------------------------------------------------------------------------------------------------------------|--------------------|----------------------------------------------------------------------------------|----------------------------------------------------------------------|----------------------------------------------------------------------|-------------------------------------------------------------------------------------------------------|----------------------------------------------------------------------------------------------------------------|----------------------------------------------------------------------------------------------------------------|----------------------------------------------------------------------------------|-------------------------------------------------------------------|--------------------------------------------------------------------------------|
| A2. Deficits in nonverbal communicative behaviors used for social interaction; ranging from poorly integrated- verbal and nonverbal communication, through abnormalities in eye contact and body-language, or deficits in understanding and use of nonverbal communication, to total lack of facial expression or gestures      | ADI-R ITEMS (CUR.) | SOCIAL50<br>COM42<br>COM43<br>COM44<br>COM45<br>SOCIAL57<br>SOCIAL56             | SOCIAL50<br>COM42<br>COM43<br>COM44<br>COM45<br>SOCIAL57<br>SOCIAL56 | SOCIAL50<br>COM42<br>COM43<br>COM44<br>COM45<br>SOCIAL57<br>SOCIAL56 | COM42<br>COM43<br>COM44<br>COM45<br>SOCIAL57<br>SOCIAL56                                              | COM42<br>COM43<br>COM44<br>COM45<br>SOCIAL57<br>SOCIAL56                                                       | COM42<br>COM43<br>COM44<br>COM45<br>SOCIAL57<br>SOCIAL56                                                       | COM42<br>COM43<br>COM44<br>COM45<br>SOCIAL57<br>SOCIAL56                         | COM42<br>COM43<br>COM44<br>COM45<br>SOCIAL57<br>SOCIAL56          | COM42<br>COM43<br>COM44<br>COM45<br>SOCIAL57<br>SOCIAL56                       |
|                                                                                                                                                                                                                                                                                                                                 | ADOS ITEMS         | MOD1B4<br>MOD1B7 <sup>b</sup><br>MOD1A7<br>MOD1B11<br>MOD1B1<br>MOD1B3<br>MOD1A8 | MOD2A7<br>MOD2B7<br>MOD2B1<br>MOD2B2<br>MOD2A8                       | MOD3B1<br>MOD3B2<br>MOD3A9<br>MOD3B3 <sup>b</sup>                    | MOD1B4<br>MOD1B7 <sup>b</sup><br>MOD1A7<br>MOD1B11<br>MOD1B1<br>MOD1B3<br>MOD1A8                      | MOD2A7<br>MOD2B7<br>MOD2B1<br>MOD2B2<br>MOD2A8                                                                 | MOD3B1<br>MOD3B2<br>MOD3A9<br>MOD3B3 <sup>b</sup>                                                              | MOD1B4<br>MOD1B7 <sup>b</sup><br>MOD1A7<br>MOD1B11<br>MOD1B1<br>MOD1B3<br>MOD1A8 | MOD2A7<br>MOD2B7<br>MOD2B1<br>MOD2B2<br>MOD2A8                    | MOD3&4B1<br>MOD3&4B2<br>MOD3&4A9<br>MOD3&4B3 <sup>b</sup><br>MOD4A10<br>MOD4B5 |
| A3. Deficits in developing and maintaining relationships, appropriate to developmental level (beyond those with caregivers); ranging from difficulties adjusting behavior to suit different social contexts through difficulties in sharing imaginative play and in making friends to an apparent absence of interest in people | ADI-R ITEMS (CUR.) | SOCIAL58<br>SOCIAL53<br>SOCIAL59<br>SOCIAL62<br>SOCIAL63                         | COM36<br>SOCIAL58<br>SOCIAL53<br>SOCIAL59<br>SOCIAL62<br>SOCIAL63    | COM36<br>SOCIAL58<br>SOCIAL53<br>SOCIAL59<br>SOCIAL62<br>SOCIAL63    | SOCIAL58<br>SOCIAL53<br>SOCIAL59<br>SOCIAL62<br>SOCIAL63<br>COM49<br>SOCIAL64<br>SOCIAL35<br>SOCIAL66 | COM36<br>SOCIAL58<br>SOCIAL53<br>SOCIAL59<br>SOCIAL62<br>SOCIAL63<br>COM49<br>SOCIAL64<br>SOCIAL35<br>SOCIAL66 | COM36<br>SOCIAL58<br>SOCIAL53<br>SOCIAL59<br>SOCIAL62<br>SOCIAL63<br>COM49<br>SOCIAL64<br>SOCIAL35<br>SOCIAL66 | SOCIAL58<br>SOCIAL53<br>SOCIAL59<br>SOCIAL35<br>SOCIAL66                         | COM36<br>SOCIAL58<br>SOCIAL53<br>SOCIAL59<br>SOCIAL35<br>SOCIAL66 | COM36<br>SOCIAL58<br>SOCIAL53<br>SOCIAL59<br>SOCIAL35<br>SOCIAL66              |
|                                                                                                                                                                                                                                                                                                                                 | ADOS ITEMS         |                                                                                  | MOD2B11<br>MOD2B9                                                    | MOD3B10<br>MOD3B8                                                    |                                                                                                       | MOD2B11<br>MOD2B9                                                                                              | MOD3B10<br>MOD3B8                                                                                              |                                                                                  | MOD2B11<br>MOD2B9                                                 | MOD3B10/<br>MOD4B12<br>MOD3B8/<br>MOD4B10                                      |



|                                                                                                                                                                                                                                                                                                    |                    |                         |                         |                         |                         |                         |                         |                         |                         |                         |
|----------------------------------------------------------------------------------------------------------------------------------------------------------------------------------------------------------------------------------------------------------------------------------------------------|--------------------|-------------------------|-------------------------|-------------------------|-------------------------|-------------------------|-------------------------|-------------------------|-------------------------|-------------------------|
| preoccupation with unusual objects, excessively circumscribed or perseverative interests)                                                                                                                                                                                                          | ADOS ITEMS         |                         |                         | MOD3D4                  |                         |                         | MOD3D4                  |                         |                         | MOD3&4D4                |
| B4. Hyper- or hypo-reactivity to sensory input or unusual interest in sensory aspects of environment; (such as apparent indifference to pain, heat, cold, adverse response to specific sounds or textures, excessive smelling or touching of objects, fascination with lights or spinning objects) | ADI-R ITEMS (EVER) | RRB72<br>RRB73<br>RRB71 |
|                                                                                                                                                                                                                                                                                                    | ADOS ITEMS         | MOD1D1                  | MOD2D1                  | MOD3D1                  | MOD1D1                  | MOD2D1                  | MOD3D1                  | MOD1D1                  | MOD2D1                  | MOD3&4D1                |

Note: <sup>a</sup> = Moved from A2 based on experts' comments

<sup>b</sup> = Added based on experts' comments

<sup>c</sup> = Based on experts' comments, intonation items on ADI-R and ADOS removed from repetitive speech for all groups

Supplementary Table S2. ADI-R and ADOS Items Applied to DSM-IV-TR Criteria

|                                                                                                                                                                            |                   | Under 4,<br>Mod 1                                                                       | Under 4,<br>Mod 2                                                                       | Under 4,<br>Mod 3                                                                       | 4 to 10,<br>Mod 1                                                                | 4 to 10,<br>Mod 2                               | 4 to 10,<br>Mod 3                               | Over 10,<br>Mod 1                                                                | Over 10,<br>Mod 2                               | Over 10,<br>Mod 3-4                                                                |
|----------------------------------------------------------------------------------------------------------------------------------------------------------------------------|-------------------|-----------------------------------------------------------------------------------------|-----------------------------------------------------------------------------------------|-----------------------------------------------------------------------------------------|----------------------------------------------------------------------------------|-------------------------------------------------|-------------------------------------------------|----------------------------------------------------------------------------------|-------------------------------------------------|------------------------------------------------------------------------------------|
| A1 (a) Marked impairment in the use of multiple nonverbal behaviors such as eye-to-eye gaze, facial expression, body postures, and gestures to regulate social interaction | ADI-R ITEMS (CUR) | SOCIAL50<br>SOCIAL57<br>COM43<br>COM44<br>COM45<br>SOCIAL56                             | SOCIAL50<br>SOCIAL57<br>COM43<br>COM44<br>COM45<br>SOCIAL56                             | SOCIAL50<br>SOCIAL57<br>COM43<br>COM44<br>COM45<br>SOCIAL56                             | SOCIAL57<br>COM43<br>COM44<br>COM45<br>SOCIAL56                                  | SOCIAL57<br>COM43<br>COM44<br>COM45<br>SOCIAL56 | SOCIAL57<br>COM43<br>COM44<br>COM45<br>SOCIAL56 | SOCIAL57<br>COM43<br>COM44<br>COM45<br>SOCIAL56                                  | SOCIAL57<br>COM43<br>COM44<br>COM45<br>SOCIAL56 | SOCIAL57<br>COM43<br>COM44<br>COM45<br>SOCIAL56                                    |
|                                                                                                                                                                            | ADOS ITEMS        | MOD1B11<br>MOD1A7<br>MOD1A8<br>MOD1B1<br>MOD1B3<br>MOD1B4<br>MOD1B7 <sup>3</sup>        | MOD2B7<br>MOD2A7<br>MOD2A8<br>MOD2B1<br>MOD2B2                                          | MOD3A9<br>MOD3B1<br>MOD3B2<br><br>MOD3B3                                                | MOD1B11<br>MOD1A7<br>MOD1A8<br>MOD1B1<br>MOD1B3<br>MOD1B4<br>MOD1B7 <sup>3</sup> | MOD2B7<br>MOD2A7<br>MOD2A8<br>MOD2B1<br>MOD2B2  | MOD3A9<br>MOD3B1<br>MOD3B2<br><br>MOD3B3        | MOD1B11<br>MOD1A7<br>MOD1A8<br>MOD1B1<br>MOD1B3<br>MOD1B4<br>MOD1B7 <sup>3</sup> | MOD2B7<br>MOD2A7<br>MOD2A8<br>MOD2B1<br>MOD2B2  | MOD3&4A9<br>MOD3&4B1<br>MOD3&4B2<br><br>MOD3&4B3<br>MOD4A10<br>MOD4B5              |
| A1 (b) Failure to develop peer relationships appropriate to developmental level                                                                                            | ADI-R ITEMS (CUR) | SOCIAL62<br>SOCIAL63                                                                    | SOCIAL62<br>SOCIAL63                                                                    | SOCIAL62<br>SOCIAL63                                                                    | SOCIAL62<br>SOCIAL63<br>SOCIAL64<br>SOCIAL65                                     | SOCIAL62<br>SOCIAL63<br>SOCIAL64<br>SOCIAL65    | SOCIAL62<br>SOCIAL63<br>SOCIAL64<br>SOCIAL65    | SOCIAL65                                                                         | SOCIAL65                                        | SOCIAL65                                                                           |
|                                                                                                                                                                            | ADOS ITEMS        | Not Available                                                                           | Not Available                                                                           | Not Available                                                                           | Not Available                                                                    | Not Available                                   | Not Available                                   | Not Available                                                                    | Not Available                                   | Not Available                                                                      |
| A1 (c) A lack of spontaneous seeking to share enjoyment, interests, or achievements with other people                                                                      | ADI-R ITEMS (CUR) | SOCIAL52<br>SOCIAL54<br>COM42                                                           | SOCIAL52<br>SOCIAL54<br>COM42                                                           | SOCIAL52<br>SOCIAL54<br>COM42                                                           | SOCIAL52<br>SOCIAL54<br>COM42                                                    | SOCIAL52<br>SOCIAL54<br>COM42                   | SOCIAL52<br>SOCIAL54<br>COM42                   | SOCIAL52<br>SOCIAL54<br>COM42                                                    | SOCIAL52<br>SOCIAL54<br>COM42                   | SOCIAL52<br>SOCIAL54<br>COM42                                                      |
|                                                                                                                                                                            | ADOS ITEMS        | MOD1B5<br>MOD1B8<br>MOD1B9<br>MOD1B10<br>MOD1A2                                         | MOD2B3<br><br>MOD2B5<br>MOD2B6<br><br>MOD2A2                                            | MOD3B4<br><br><br>MOD3A5                                                                | MOD1B5<br>MOD1B8<br>MOD1B9<br>MOD1B10<br>MOD1A2                                  | MOD2B3<br><br>MOD2B5<br>MOD2B6<br><br>MOD2A2    | MOD3B4<br><br><br>MOD3A5                        | MOD1B5<br>MOD1B8<br>MOD1B9<br>MOD1B10<br>MOD1A2                                  | MOD2B3<br><br>MOD2B5<br>MOD2B6<br><br>MOD2A2    | MOD3&4B4<br><br><br>MOD3&4A5                                                       |
| A1 (d) Lack of social or emotional reciprocity                                                                                                                             | ADI-R ITEMS (CUR) | SOCIAL55<br>SOCIAL59<br>SOCIAL53<br>COM31<br>COM46<br>SOCIAL58<br>SOCIAL51 <sup>1</sup> | SOCIAL55<br>SOCIAL59<br>SOCIAL53<br>COM31<br>COM46<br>SOCIAL58<br>SOCIAL51 <sup>1</sup> | SOCIAL55<br>SOCIAL59<br>SOCIAL53<br>COM31<br>COM46<br>SOCIAL58<br>SOCIAL51 <sup>1</sup> | SOCIAL55<br>SOCIAL59<br>SOCIAL53<br>COM31                                        | SOCIAL55<br>SOCIAL59<br>SOCIAL53<br>COM31       | SOCIAL55<br>SOCIAL59<br>SOCIAL53<br>COM31       | SOCIAL55<br>SOCIAL59<br>SOCIAL53<br>COM31                                        | SOCIAL55<br>SOCIAL59<br>SOCIAL53<br>COM31       | SOCIAL55<br>SOCIAL59<br>SOCIAL53<br>COM31<br><br>SOCIAL58<br>SOCIAL51 <sup>1</sup> |

|                                                                                                                                                                                        |                   |                                                                    |                                                                    |                                                                    |                                                                    |                                                                    |                                                                    |                                                                    |                                                                    |                                                                                              |
|----------------------------------------------------------------------------------------------------------------------------------------------------------------------------------------|-------------------|--------------------------------------------------------------------|--------------------------------------------------------------------|--------------------------------------------------------------------|--------------------------------------------------------------------|--------------------------------------------------------------------|--------------------------------------------------------------------|--------------------------------------------------------------------|--------------------------------------------------------------------|----------------------------------------------------------------------------------------------|
|                                                                                                                                                                                        | ADOS ITEMS        | MOD1B12<br>MOD1A6<br>MOD1B6<br>MOD1B2 <sup>1</sup>                 | MOD2B8<br><br>MOD2B4<br><br>MOD2B9<br>MOD2B11<br>MOD2B10           | MOD3B7<br><br><br>MOD3B8<br>MOD3B10<br>MOD3B9                      | MOD1B12<br>MOD1A6<br>MOD1B6<br>MOD1B2 <sup>1</sup>                 | MOD2B8<br><br>MOD2B4<br><br>MOD2B9<br>MOD2B11<br>MOD2B10           | MOD3B7<br><br><br>MOD3B8<br>MOD3B10<br>MOD3B9                      | MOD1B12<br>MOD1A6<br>MOD1B6<br>MOD1B2 <sup>1</sup>                 | MOD2B8<br><br>MOD2B4<br><br>MOD2B9<br>MOD2B11<br>MOD2B10           | MOD3B7/<br>MOD4B9<br><br><br>MOD3B8/<br>MOD4B10<br>MOD3B10/<br>MOD4B12<br>MOD3B9/<br>MOD4B11 |
| A2 (a) Delay in, or total lack of, the development of spoken language (not accompanied by an attempt to compensate through alternative modes of communication such as gesture or mime) | ADI-R ITEMS (CUR) | Defined based on “Overall Level of Language” and Gestures (LANG35) | Defined based on “Overall Level of Language” and Gestures (LANG35) | Defined based on “Overall Level of Language” and Gestures (LANG35) | Defined based on “Overall Level of Language” and Gestures (LANG35) | Defined based on “Overall Level of Language” and Gestures (LANG35) | Defined based on “Overall Level of Language” and Gestures (LANG35) | Defined based on “Overall Level of Language” and Gestures (LANG35) | Defined based on “Overall Level of Language” and Gestures (LANG35) | Defined based on “Overall Level of Language” and Gestures (LANG35)                           |
|                                                                                                                                                                                        | ADOS ITEMS        | Defined based on Module and Gestures (MOD1A8)                      | Defined based on Module and Gestures (MOD2A8)                      | Defined based on Module and Gestures (MOD3A9)                      | Defined based on Module and Gestures (MOD1A8)                      | Defined based on Module and Gestures (MOD2A8)                      | Defined based on Module and Gestures (MOD3A9)                      | Defined based on Module and Gestures (MOD1A8)                      | Defined based on Module and Gestures (MOD2A8)                      | Defined based on Module and Gestures (MOD3A9/<br>MOD4A9)                                     |
| A2 (b) In individuals with adequate speech, marked impairment in the ability to initiate or sustain a conversation with others                                                         | ADI-R ITEMS (CUR) | Not applicable                                                     | COM34<br>COM35                                                     | COM34<br>COM35                                                     | Not applicable                                                     | COM34<br>COM35                                                     | COM34<br>COM35                                                     | Not applicable                                                     | COM34<br>COM35                                                     | COM34<br>COM35                                                                               |
|                                                                                                                                                                                        | ADOS ITEMS        | Not applicable                                                     | MOD2A6                                                             | MOD3A8<br>MOD3A6                                                   | Not applicable                                                     | MOD2A6                                                             | MOD3A8<br>MOD3A6                                                   | Not applicable                                                     | MOD2A6                                                             | MOD3&4A8<br>MOD3&4A6                                                                         |
| A2 (c) Stereotyped or repetitive use of language or idiosyncratic language <sup>b</sup>                                                                                                | ADI-R ITEMS (CUR) | Not applicable                                                     | COM33<br>COM37<br>COM38                                            | COM33<br>COM37<br>COM38                                            | Not applicable                                                     | COM33<br>COM37<br>COM38                                            | COM33<br>COM37<br>COM38                                            | Not applicable                                                     | COM33<br>COM37<br>COM38                                            | COM33<br>COM37<br>COM38                                                                      |
|                                                                                                                                                                                        | ADOS ITEMS        | MOD1A4<br>MOD1A5                                                   | MOD2A4<br>MOD2A5                                                   | MOD3A3<br>MOD3A4                                                   | MOD1A4<br>MOD1A5                                                   | MOD2A4<br>MOD2A5                                                   | MOD3A3<br>MOD3A4                                                   | MOD1A4<br>MOD1A5                                                   | MOD2A4<br>MOD2A5                                                   | MOD3&4A3<br>MOD3&4A4                                                                         |
| A2 (d) Lack of varied, spontaneous make-believe play or social imitative play appropriate to developmental level                                                                       | ADI-R ITEMS (CUR) | SOCIAL61<br>COM48<br>COM47                                         | SOCIAL61<br>COM48<br>COM47                                         | SOCIAL61<br>COM48<br>COM47                                         | SOCIAL61<br>COM48<br>COM47<br>COM49                                | SOCIAL61<br>COM48<br>COM47<br>COM49                                | SOCIAL61<br>COM48<br>COM47<br>COM49                                | Not applicable                                                     | Not applicable                                                     | Not applicable                                                                               |
|                                                                                                                                                                                        | ADOS ITEMS        | MOD1C2                                                             | MOD2C2                                                             | MOD3C1                                                             | MOD1C2                                                             | MOD2C2                                                             | MOD3C1                                                             | MOD1C2                                                             | MOD2C2                                                             | MOD3&4C1                                                                                     |

|                                                                                                                                                                                                                    |                   |                                        |                                        |                                        |                                        |                                        |                                        |                                        |                                        |                                        |
|--------------------------------------------------------------------------------------------------------------------------------------------------------------------------------------------------------------------|-------------------|----------------------------------------|----------------------------------------|----------------------------------------|----------------------------------------|----------------------------------------|----------------------------------------|----------------------------------------|----------------------------------------|----------------------------------------|
| A3 (a) Encompassing preoccupation with one or more stereotyped and restricted patterns of interest that is abnormal either in intensity or focus                                                                   | ADI-R ITEMS (CUR) | RRB67<br>RRB68<br>RRB76                |
|                                                                                                                                                                                                                    | ADOS ITEMS        | Not available                          | Not available                          | MOD3D4 <sup>4</sup>                    | Not available                          | Not available                          | MOD3D4 <sup>4</sup>                    | Not available                          | Not available                          | MOD3&4D4 <sup>4</sup>                  |
| A3 (b) Apparently inflexible adherence to specific, nonfunctional routines or rituals                                                                                                                              | ADI-R ITEMS (CUR) | RRB70<br>RRB74<br>RRB75                | RRB70<br>RRB74<br>RRB75<br>COM39       | RRB70<br>RRB74<br>RRB75<br>COM39       | RRB70<br>RRB74<br>RRB75                | RRB70<br>RRB74<br>RRB75<br>COM39       | RRB70<br>RRB74<br>RRB75<br>COM39       | RRB70<br>RRB74<br>RRB75                | RRB70<br>RRB74<br>RRB75<br>COM39       | RRB70<br>RRB74<br>RRB75<br>COM39       |
|                                                                                                                                                                                                                    | ADOS ITEMS        | Not applicable                         | Not applicable                         | MOD3D5                                 | Not applicable                         | Not applicable                         | MOD3D5                                 | Not applicable                         | Not applicable                         | MOD3&4D5                               |
| A3 (c) Stereotyped and repetitive motor mannerisms                                                                                                                                                                 | ADI-R ITEMS (CUR) | RRB78<br>RRB77                         |
|                                                                                                                                                                                                                    | ADOS ITEMS        | MOD1D2                                 | MOD2D2                                 | MOD3D2                                 | MOD1D2                                 | MOD2D2                                 | MOD3D2                                 | MOD1D2                                 | MOD2D2                                 | MOD3&4D2                               |
| A3 (d) Persistent preoccupation with parts of objects                                                                                                                                                              | ADI-R ITEMS (CUR) | RRB69<br>RRB71 <sup>3</sup>            |
|                                                                                                                                                                                                                    | ADOS ITEMS        | MOD1D4<br>MOD1D1                       | MOD2D4<br>MOD2D1                       | MOD3D1                                 | MOD1D4<br>MOD1D1                       | MOD2D4<br>MOD2D1                       | MOD3D1                                 | MOD1D4<br>MOD1D1                       | MOD2D4<br>MOD2D1                       | MOD3&4D1                               |
| B. Delays or abnormal functioning in at least 1 of the following areas, with onset prior to age 3 years: (1) social interaction, (2) language as used in social communication, or (3) symbolic or imaginative play | ADI-R ITEMS (CUR) | Defined by ADI-R section D total score |
|                                                                                                                                                                                                                    | ADOS ITEMS        | Not applicable                         |

Note: <sup>1</sup> Moved from A1 (a) based on experts' comments

<sup>2</sup> Based on experts' comments, the intonation item was removed from repetitive speech for all groups

<sup>3</sup> Added based on experts' comments

<sup>4</sup> Moved from A3(d) based on experts' comments
